# Supplementary material
Source: publisher figshare collection journal article supplement (https://gsapubs.figshare.com/ndownloader/files/22388046)
Supplement: Supplementary file 1 [file 22388046]

## Sheet: Sheet1
Orr, E.N., Owen, L.A., Saha, S., and Caffee, M.W., 2020, Climate-driven late Quaternary fan surface abandonment in the NW Himalaya, in Waitt, R.B., Thackray, G.D., and Gillespie, A.R., eds.,
Untangling the Quaternary Period: A Legacy of Stephen C. Porter: Geological Society of America Special Paper 548, https://doi.org/10.1130/2020.2548(04).
	APPENDIX S2. SAMPLE DETAILS WITH THE INITIAL AND RECALCULATED 10BE AGES (UNCERTAINTY IS EXPRESSED AS 1σ )
Sample name	Fan	Location		Altitude	TSF*	10Be	Int. exposure age†	LSD exposure age§	Internal error	External error
		Latitude (oN)	Longitude (oE)	(m asl)		(106 atoms/g)	(ka)	(ka)	(ka)	(ka)
R2	Rilkot1	30.31	80.21	3070	0.96	0.03±0.002	0.9±0.07	1.43	0.1	0.13
R3	Rilkot1	30.31	80.21	3196	0.96	0.02±0.002	0.5±0.06	0.87	0.09	0.11
R4	Rilkot1	30.31	80.21	3169	0.96	0.04±0.004	1.0±0.1	1.82	0.19	0.22
BH9	Bhuj Kharak1	30.96	78.94	3896	0.93	0.1±0.01	1.8±0.2	3.27	0.44	0.47
BH16	Kedar Kharak1	30.94	78.95	4314	0.97	0.4±0.01	6.6±0.2	9.75	0.23	0.57
BH21	Rudugaira1	31	78.92	3015	0.95	0.2±0.01	5.2±0.2	7.79	0.26	0.47
BH33	Gaumukh1	30.95	79.06	4140	0.97	0.2±0.001	3.7±0.2	5.48	0.17	0.29
B34	Gaumukh1	30.95	79.06	4145	0.97	0.1±0.01	1.9±0.1	3.09	0.21	0.28
BH38	Gaumukh2	30.95	79.06	3857	0.97	0.04±0.01	0.7±0.1	1.17	0.24	0.25
BH39	Gaumukh2	30.95	79.06	3863	0.97	0.05±0.01	0.9±0.1	1.5	0.25	0.27
KK97-36	Tangtse1	34.006	78.299	4350	0.977	2.0±0.1	32.0±3.0	32.19	1.91	2.57
KK97-37	Tangtse1	34.006	78.299	4350	0.977	2.4±0.2	37.5±4.1	38.63	2.64	3.16
KK97-38	Tangtse1	34.006	78.299	4350	0.977	1.1±0.1	16.4±2.1	19	1.48	1.72
KK97-39	Tangtse1	34.006	78.299	4350	0.977	1.3±0.1	19.7±2.0	21.71	1.29	1.64
KK97-40	Tangtse1	34.006	78.299	4350	0.977	1.3±0.1	20.5±2.1	21.71	1.29	1.64
KK98-9	Tangtse1	34.006	78.299	4350	0.977	1.1±0.1	17.3±1.7	19	1.48	1.72
KK98-10	Tangtse1	34.006	78.299	4350	0.977	1.1±0.2	16.8±2.9	19	2.9	3.03
KK98-11	Tangtse1	34.006	78.299	4350	0.977	1.0±0.1	16.3±2.1	17.46	1.56	1.79
KK98-12	Tangtse1	34.006	78.299	4350	0.977	1.2±0.1	18.5±1.9	20.44	1.34	1.62
KK98-13	Tangtse1	34.006	78.299	4350	0.977	2.9±0.2	45.9±4.2	45.1	3.73	4.7
KK98-1	Tangtse2	34.006	78.299	4350	0.977	0.1±0.04	2.3±0.6	2.07	0.87	0.88
KK98-3	Tangtse2	34.006	78.299	4350	0.977	0.2±0.03	3.3±0.6	4.19	0.59	0.63
KK98-4	Tangtse2	34.006	78.299	4350	0.977	0.5±0.05	7.1±1.0	9.44	0.95	1.08
KK98-5	Tangtse2	34.006	78.299	4350	0.977	0.1±0.01	1.8±0.3	2.06	0.22	0.25
KK98-6	Tangtse2	34.006	78.299	4350	0.977	0.4±0.04	5.6±0.8	7.48	0.66	0.76
KK98-7	Tangtse2	34.006	78.299	4350	0.977	0.3±0.1	4.8±1.0	5.94	1.63	1.65
KK98-8	Tangtse2	34.006	78.299	4350	0.977	0.8±0.1	12.7±1.3	14.32	1.53	1.7
KK98-14	Tangtse2	34.006	78.299	4350	0.977	0.1±0.01	1.7±0.3	2.06	0.22	0.25
KK98-15	Tangtse2	34.006	78.299	4350	0.977	0.1±0.01	1.3±0.2	2.06	0.22	0.25
*: Topographic Shielding Factor
†: Initial exposure ages: Rilkot1, Gaumukh1-2 (Barnard et al., 2004b,a), Tangtse1-2 (Brown et al., 2002,2003).
§: Production rate for the CREP calculator is 4.13±0.2 10Be atoms/grams SiO2/year (Martin et al., 2016) with a 10Be half-life of 1.36Ma. Minimum exposure age is calculated using the Balco et al. (2008)
calibration dataset (10Be decay constant of 5.1±0.3x10-7) and Lifton et al. (2014) calculation scheme with the Lifton 2016 VDM geomagnetic database.
